# Supplementary material for: Contrasting dynamics of lake- and marine-terminating glaciers under same climatic conditions
Source: Copernicus journal article supplement (doi:10.5194/egusphere-2025-5733), 2025-12-15
Supplement: Supplementary file [file egusphere-2025-5733-AC2-supplement.pdf]

## Author Response to comments by referee 2

Manuscript tc-2025-5733: Contrasting dynamics of lake- and marine-terminating glaciers under same climatic conditions

March 31, 2026

Dear Referee,

Thank you for taking the time to provide us with a detailed review. We believe that your comments challenging some of our interpretations have strengthened our discussion section and made our findings clearer. We provide our response in the following with your comments coloured blue, our responses black, and manuscript changes brown.

Florian Vacek,

on behalf of all authors

## Summary

### Reviewer Comment:

Vacek et al. present a clever natural lab study of the Qooqqup Sermia system in South Greenland, which splits into two branches, one terminating in fjord water and the other in lake water. The authors use the two different terminus environments to investigate changes in glacier behavior that may be caused by the type of water into which a glacier terminates, while the glacier system experiences the same climate forcing. The authors use an impressive combination of remote sensing, field observations, and model outputs to compare the two termini, with the main conclusion being that subaqueous melt rates are the main driver for the different glacier behavior. This manuscript is novel in concept, well written, presents clear and professional figures, and is perfectly within the scope of The Cryosphere. However, the author's analysis supporting their main conclusions is not convincing enough to recommend immediate acceptance. I therefore recommend this manuscript be reconsidered after major revisions. I will happily recommend acceptance once the authors clarify or modify their claim that subaqueous melt rates drive the differences between the two glaciers.

### Author Response:

Thank you for your generally positive summary. We addressed your concerns, specifically about our main conclusion and have changed our manuscript accordingly. See our specific answers below.

The referee provided a detailed comment (comment 1) questioning our interpretation of subaqueous melt rates at both the marine and lake termini of Qooqqup Sermia, as well as the conclusions we derive from this interpretation. Before giving specific answers to each of the paragraphs of the comment, we wanted to clarify that we are not arguing for exceptionally high melt rates at the marine terminus compared to other marine termini. However, we argue that the melt rates in the fjord must be significantly higher than those in the lake and that these differences contribute to the different dynamics that we observe. For this we have several arguments and observations outlined in the revised section 5.5:

## Manuscript Changes:

1. Freezing point depression: In the marine environment, the freezing point of ocean water is lowered due to the salt content. With a salinity of 32 PSU the freezing point drops to about  $-1.8\text{ }^{\circ}\text{C}$ . A lower freezing point increases the thermal driving (or thermal excess), consequently increasing submarine melt rates. Even in a cold ocean environment this freezing point depression leads to higher melt rates compared to a freshwater environment. For example, assuming an ocean temperature of  $0.6\text{ }^{\circ}\text{C}$  (average temperature of the top 100 m measured by Hansen et al. (2025) in Tunulliarfik Fjord, close to Qooroq Fjord ) and a lake temperature of  $0.7\text{ }^{\circ}\text{C}$  (measured in lake Motzfeldt) results in a thermal driving that is 3 to 4 times higher in the ocean compared to the lake ( $2.4\text{ }^{\circ}\text{C}$  vs  $0.7\text{ }^{\circ}\text{C}$  above the freezing point).
2. No subglacial plume formation: The formation of subglacial plumes can significantly enhance submarine melt rates (Jenkins, 2011), promote undercutting, and consequently calving (Slater et al., 2017). However, lakes generally consist of freshwater and therefore lack vertical circulation at the ice front, driven by the density differences of fresh and salt water (Truffer and Motyka, 2016). Consequently, we observe the formation of subglacial plumes at MT but not at LT, arguably leading to even higher melt rates at MT compared to LT. Furthermore, this implies that additional runoff at MT would enhance melt rates by generating stronger plumes, whereas in the lake, additional runoff would not affect melt rates and could even cause the lake to cool. This could possibly explain why seasonality in front positions is observed at MT but not at LT.
3. Heat transport: A lake is a semi-closed system where no transport of large quantities of warm water masses toward the glacier front from distant sources takes place. The energy input to the lake is limited to long and short wave radiation, heat exchange with the atmosphere, and advected heat (e.g., rainwater, streams, and groundwater) (Wetzel and Likens, 2000). In the fjord, on the other hand, water masses can be transported to and from the glacier front through ocean circulation and exchange with more distant water masses. Even in fjords with a prominent sill, exchange with shelf water is not completely blocked, and cold water can be transported away and exchanged with warmer waters (e.g. Mortensen et al., 2018).

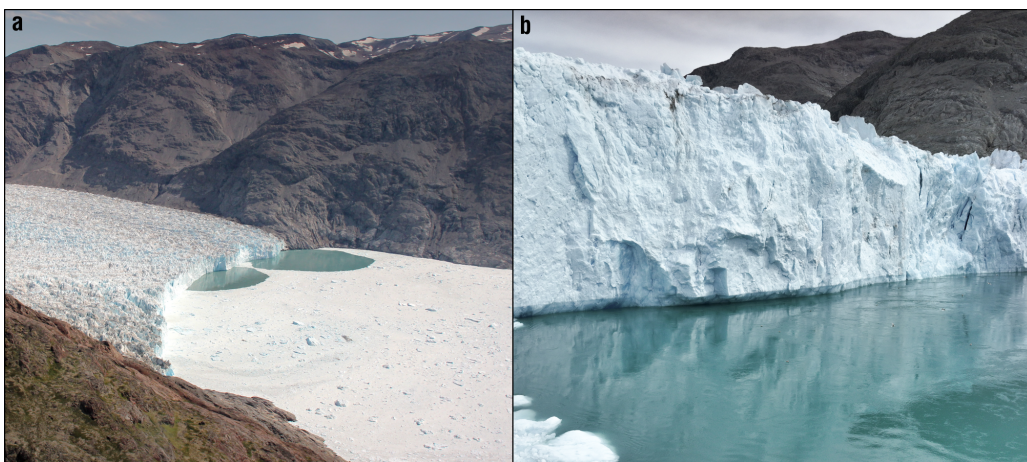

Figure 1: Melt water plume at Qooqqup Sermia (a) two plumes observed at Qooqqup Sermia on 26 July 2025 (b) close up drone image showing the plume and distinct undercutting at the glacier front.

## **Comment 1: Low subaqueous melt rates in the lake are the main driver of these differences**

### **Reviewer Comment:**

The authors provide clear evidence from their CTDs (Fig. A2) that the lake water temperature is very cold, presumably causing a low subaqueous melt rate. They do not provide strong evidence to support that melt rates are the reason why the MT glacier behaves differently.

### **Author Response:**

First, in order to strengthen our argument that subaqueous melt rates must be very low at LT compared to MT, we have extended Section 5.5 and elaborate in more detail about the physical properties of the lake compared to the ocean. The main arguments for that are provided in the list above.

Second, we have revised Section 5.4 about the dynamics of MT. We switched from a narrative of "runoff-dominated" and "runoff-driven" to elaborating more on the indications that we have that the seasonal front variations are influenced by submarine melt through plume formation. We observe that the majority of Qooqqup Sermia's frontal retreat takes place during the runoff season, whereas most of its advance occurs outside of the runoff season. Front advance appears to begin as soon as the runoff season ends. Slightly less consistently, front retreat starts approximately with the beginning of the runoff season (or slightly earlier). This seasonality of glacier front positions is widely observed in Greenland (Schild and Hamilton, 2013; Moon et al., 2015; Black and Joughin, 2023; Greene et al., 2024) and has been suggested to be mainly driven by meltwater runoff (Black and Joughin, 2023; Fried et al., 2018) and the presence or absence of an ice mélange (Joughin et al., 2008; Todd and Christoffersen, 2014; Cassotto et al., 2015; Kneib-Walter et al., 2021; Wehrlé et al., 2023), both of which affect the calving rate. While we have no time series record of ice mélange presence or absence, Fig. 7 and 8 in the manuscript show that the ice front position seems to at least be influenced by runoff. This is further supported by Figure 1 (in this document) clearly showing a meltwater plume as well as undercutting of the ice front at MT. (we intend to include this figure in the appendix of the new manuscript). In the revised manuscript we state that the seasonality of glacier front positions is influenced by subglacial runoff, however, with other processes likely also playing a role.

### **Manuscript Changes:**

#### **Revised paragraphs in Section 5.4:**

Since 2004, the glacier remained at approximately the same position with seasonal ice-front advance during winter (October–May) and retreat during summer (June–September). The position around which the glacier front oscillates is characterised by a visible narrowing of the fjord through a bedrock protrusion on either side. Seasonal advance and retreat of glacier fronts are common phenomena (Schild and Hamilton, 2013; Moon et al., 2015; Black and Joughin, 2023), observed at more than 80 % of marine-terminating glaciers in Greenland (Greene et al., 2024). This seasonality of glacier front positions has been suggested to be mainly driven by meltwater runoff (Black and Joughin, 2023; Fried et al., 2018) and the presence or absence of an ice mélange (Joughin et al., 2008; Todd and Christoffersen, 2014; Cassotto et al., 2015; Kneib-Walter et al., 2021; Wehrlé et al., 2023), both of which affect the calving

rate. In agreement with these findings, we observe that the majority of Qooqqup Sermia's frontal retreat takes place during the runoff season, whereas most of its advance occurs outside of the runoff season (Fig. 7 and 8), indicating that the ice-front position is influenced by submarine melting due to meltwater runoff. This is supported by observations during both field campaigns and on satellite images, where we observed meltwater plumes for extended periods during the melt season (see Fig. A3). These plumes, formed by runoff entering the fjord subglacially, enhance submarine melting and can trigger calving by undercutting the ice-front (Rignot et al., 2015; Fried et al., 2015; Slater et al., 2017; Hewitt, 2020). Fig. A3b also shows strong undercutting of the glacier front at the location of the plume. The calving that we observe at MT can be classified as serac collapse type (Bézu and Bartholomäus, 2024) with frequent calving of small icebergs.

However, in some years, the coupling of ice-front position and runoff is slightly less evident. In the years 2019–2021 the front position starts to retreat before the beginning of the melt season. Similar observations at other glaciers showed that this can be caused by an early clearing of the ice mélange and the accompanied reduction of resistive stresses at the glacier front (Cassotto et al., 2015; Bevan et al., 2019; Wehrlé et al., 2023). However, we have no time series documenting the presence of an ice mélange at Qooqqup Sermia to confirm this. Therefore, we conclude that the seasonality of glacier front positions is influenced by subglacial runoff, however, with other processes likely also playing role.

#### **Reviewer Comment:**

The authors suggest on lines 374 - 377 that “the intrusion of warm Atlantic waters deep into fjords is a commonly observed phenomenon 375 for tidewater glaciers in all regions of Greenland”. They also comment earlier that this intrusion of warm Atlantic water is unlikely for the MT glacier in lines 335 - 339 because of the presence of a large moraine. This back-and-forth makes it unclear what the authors are trying to say about their study site.

#### **Author Response:**

We agree that these contradicting thoughts make our intended message unclear. We have therefore revised both mentioned sections. The first mentioned paragraph now clarifies that even in a fjord with a distinct moraine, exchange with shelf water is not completely blocked. While sills may keep the warmest and saltiest bottom water out of the fjord, there will always be some transport of water and mixing with other water masses, which is a clear difference to lacustrine environments. In addition to that, in Section 5.5, we elaborate that even with cold ocean conditions subaqueous melt rates must be higher at MT compared to LT for the arguments listed at the beginning of this document.

In the second mentioned paragraph about the historical evolution of the marine terminus, we acknowledge that we lack oceanographic data to assess the influence of ocean warming on the long-term evolution of the glacier.

#### **Manuscript Changes:**

Section 5.5 see list at beginning of this document.

Section 5.3, second paragraph: After reaching its most advanced position in 1994 the glacier recedes about 1.3 km until 2004, where it remains stable until today. Although the cause of the retreat of other

marine terminal glaciers in Greenland during that period is often induced by warming ocean temperatures (Wood et al., 2021), we lack oceanographic data in the inner fjord to confirm or deny this at Qooqqup Sermia.

**Reviewer Comment:**

More convincingly, the authors point out an observed subglacial plume at the MT glacier, which can enhance submarine melting. However, the presence of this large moraine can complicate melting by “trapping” subglacial discharge between the terminus and the moraine, cooling the water and limiting entrainment from the ambient water (Kajanto et al., 2023).

**Author Response:**

We agree that the sill at the fjord entrance complicates circulation in fjord. However, the provided reference (Kajanto et al., 2023) is a comparison of ocean conditions in a high-silled fjord with and without icebergs. The authors of this study describe an inflow of water above the sill in exchange for cold glacially modified water in both cases (Section 4.1 and 4.2 in that paper), therefore strengthening our point that exchange of water masses is not completely blocked by high sills. Furthermore, the authors describe a cooling of deeper basin water throughout the peak season and consequent reduction of submarine melt, in the case where icebergs with a depth of 300 m are present. However, Qooqqup Sermia does not produce these kind of large icebergs, as calving can be described of serac collapse type (see revised paragraphs of Section 5.4 in first comment).

Furthermore, the three bullet points mentioned at the beginning of this document (also part of the new revised Section 5.5), show that even with cold ocean conditions, submarine melt rates must be higher at MT compared to LT.

**Reviewer Comment:**

Furthermore, on lines 354-355, the authors claim that the marine terminus is dominated by submarine melt-induced calving events. However, from Fig. 7, there appear to be plenty of calving events outside of the runoff season, judging from the terminus position. If the MT glacier’s calving is dominated by a subglacial plume and the subsequent undercutting, why does the MT glacier calve outside of the melt season, and what mechanism is the cause of this? Maybe winter-time subglacial discharge similar to the neighboring Eqalorutsit Kangilliit Sermiat (Hansen et al., 2025)? Though this would be speculative, and who knows how much discharge is actually happening in the winter at this location.

**Author Response:**

We recognise that our formulation about the effect of submarine melt on MT was misleading. In the revised version we try to clarify the calving style of MT and which effect runoff has. We switch away from the narrative of "runoff-dominated" and elaborate more on the indications that we have that the seasonal front variations are influenced by submarine melt through plume formation. The calving of the marine terminus can be described as serac collapse type (Bézu and Bartholomäus, 2024), with very frequent but small size calving events. This type of calving is always the result of a force imbalance at the glacier front and can also occur during winter time. However, in summer due to increased undercutting, calving occurs more frequently and results in the seasonal front variations that we observe. Furthermore,

we want to clarify that the recorded ice front positions at MT represent the cumulative front change between two satellite images as the result of many small calving events and ice flow and do not represent single calving events.

See revised paragraphs of Section 5.4 in first comment

**Reviewer Comment:**

Also, if the MT front position is controlled by runoff, why isn't this the case for the LT glacier too?

**Author Response:**

Due to the lack of salinity differences, runoff does not lead to the formation of plumes in the lake (see Section 5.5 second bullet point at the beginning of the document). Therefore, any additional runoff does not increase melt rates at LT. Furthermore, the catchment of LT is an order of magnitude smaller than that of MT, reducing any possible effects at LT. Nonetheless, and due to other points raised by the referee we have changed our description from "controlled by runoff", to explaining that the seasonal front position is influenced by enhanced submarine melt through subglacial plumes. See revised paragraphs of Section 5.4 in first comment

**Reviewer Comment:**

I believe the presence of this large moraine complicates the melt-rate differences for this conclusion and makes it too difficult to claim, with confidence, that it must be the melt rates. I am also not sure how representative the ORAS5 data are of the MT retreat and MT dynamics, especially given the moraine. I also strongly encourage the authors to review Hansen et al. (2025). A CTD profile from June 2023 shows a temperature of 1 °C in the upper 100 m of Tunulliarfik Fjord (Fig. 4A; Hansen et al., 2025), whereas the June monthly average from the ORAS5 data is about 3 °C (Fig. 4A).

**Author Response:**

We agree with the referee that the ORAS5 data is likely not representative of the ocean conditions close to the glacier front. The issue regarding ORAS5 data was also raised by other reviewers. Therefore, we have removed our analysis and interpretation that relied on ORAS5 data.

We are grateful for the suggestion of reviewing (Hansen et al., 2025) and now include the reference in the discussion about melt rates in Section 5.5, which nicely illustrates that with the mentioned ocean conditions (0.6 °C average temperature of the top 100 m), the thermal driving is 3 to 4 times larger than that of the lake.

**Manuscript Changes:**

Removed all ORAS5 analysis and included the provided reference in Section 5.5.

**Reviewer Comment:**

What I find more convincing than melt-rate differences is the presence of a pinning point and substantial thinning on the LT glacier described in lines 300 - 307. If the LT thinned, lost contact with a pinning point, and then changed calving styles and a different terminus advance and retreat cycle, why exactly

is this due to the melt rates? In other words, if the bed geometries are different between the LT and MT glaciers and not the melt rates, would this not also be a possible reason for the different behaviors? The authors also claim that the pinning points can exert enough backstress to stabilize the glacier on lines 302-303, which does not depend on the melt rate from the lake. Additionally, the authors suggest that there are no visible pinning points below the MT glacier on lines 337-340. So I am very confused as to why the possible and arguably harder to justify melt rate differences are the reason for the different glacier behaviors, and not the different bed geometries? Or likely some combination of both bed geometry and melt rate, though it appears the bed plays a more important role for the LT glacier from the discussion at the end of section 5.1.

### **Author Response:**

We recognise that our manuscript did not elaborate on the important role of geometry. In the manuscript we describe that the reduced contact with the pinning point likely contributed to the disintegration of the floating ice tongue. However, we don't mention that the disintegration was connected to subaqueous melt rates. Rather we try to express that low melt rates contributed to the stability of the ice tongue which allowed it to survive for at least 25 years (earliest observation until break up in 2012). Very likely the ice tongue would not have survived in a saline setting with warmer temperatures, the formation of meltwater plumes, overall higher subaqueous melt rates and frontal ablation by calving. Furthermore, we believe that the low melt rates create favourable conditions for the glacier to form a floating ice tongue each time during the advance phase (described in Section 5.1), unrelated to the pinning point. We try to elaborate this more clearly in the revised Section 5.1. There we include the geometry as a major factor and emphasise that the low melt rates contributed to the stability of the ice tongue.

### **Manuscript Changes:**

**Revised Section 5.1:** The flat morphology of the glacier surface, the production of large tabular icebergs, as well as the buoyancy compensated thinning rates of LT suggest that prior to 2012, a floating ice tongue was present at the lake terminus (Fig. 2 and 3). Although we are unaware of other descriptions of floating ice tongues in Greenlandic lakes, they are a common phenomenon in other regions like Patagonia (Warren et al., 2001), Alaska (Boyce et al., 2007; Trüssel et al., 2013), and Iceland (Benn et al., 2007). In Greenland, fully floating ice tongues are found at marine-terminating glaciers, but only in the very north (Hill et al., 2018; Millan et al., 2023; Wekerle et al., 2024) following the disintegration of several ice tongues further south (Millan et al., 2023; Mougnot et al., 2015; Johnson et al., 2004).

We believe that the formation and sustained presence (at least 1987–2012) of the ice tongue in Lake Motzfeldt in the very south of Greenland was possible for two main reasons. First, lake Motzfeldt is exceptionally deep and therefore provides the necessary geometry. Second, subaqueous melt rates in Lake Motzfeldt are low, therefore limiting thinning rates and promoting stability. This falls in line with Truffer and Motyka (2016) who suggest that floating ice tongues in lakes can occur in more temperate regions further south compared to marine-terminating glaciers due to colder water temperatures and the lack of salinity-driven circulation, which strongly limit subaqueous melt as well as calving as a result of undercutting of the glacier front. And indeed, our CTD and temperature measurements in Lake Motzfeldt show a very cold lake, with a depth averaged temperature at the glacier front of  $< 0.7$  °C in August 2025. The lake can sustain such a cold temperature throughout the year due to meltwater input and the immense amount of icebergs present. Any additional energy input through solar radiation or heat

advection is likely transferred into the icebergs, efficiently cooling the lake.

**Reviewer Comment:**

Lastly, there is also a reference to “rapid, melt-driven calving” in the Conclusions on lines 396 - 397 to support this claim. What is “rapid, melt-driven calving”? Do you observe a top-down toppling over of a calving iceberg?

**Author Response:**

We have rephrased this bullet point due to a change of interpretation. For clarification, with melt-driven calving we referred to the undercutting of the glacier front through subglacial plumes and the consequent calving. The calving style can be described as serac collapse as for example in (Bézu and Bartholomäus, 2024).

**Manuscript Changes:**

New conclusion bullet point, also as response to reviewer 1 (coupling of front position and flow velocities):

- The marine terminus of the Qooqqup Sermia system is fast flowing, grounded, characterised by frequent serac collapse type calving and experiences seasonal front advance and retreat. Ice flow velocities appear to be coupled to the ice front position.

## Comment 2: The floating ice tongue of the lake-terminating glacier

### Reviewer Comment:

I am not sure what the authors mean in lines 292-294: “Therefore, the presence of the floating ice tongue in Lake Motzfeldt for an extended period (at least 1987–2012), despite being located in the very south of Greenland, can only be explained by the different environment at the terminus”. I am not sure whether differences in water temperature or salinity cause the LT to begin floating while the MT does not. Again, we don’t know the temperature at the MT, so it is very difficult to suggest this. However, could differences in water depth between the two glaciers be the cause?

### Author Response:

We recognise that our elaboration on the floating ice tongue was not clear enough and have therefore revised the whole section. We try to more clearly express that a certain geometry must be given to allow the formation of a floating ice tongue. Furthermore we explain that low subaqueous melt rates create favourable conditions and promote the stability of the floating ice tongue. We believe that the ice tongue would not have survived in a saline setting with warmer temperatures, the formation of meltwater plumes, and overall higher subaqueous melt rates. In our new manuscript we include the geometry as a major factor and emphasise that the low melt rates contributed to the stability of the ice tongue.

### Manuscript Changes:

We believe that the formation and sustained presence (at least 1987–2012) of the ice tongue in Lake Motzfeldt in the very south of Greenland was possible for two main reasons. First, lake Motzfeldt is exceptionally deep and therefore provides the necessary geometry. Second, subaqueous melt rates in Lake Motzfeldt are low, therefore limiting thinning rates and promoting stability. This falls in line with Truffer and Motyka (2016) who suggest that floating ice tongues in lakes can occur in more temperate regions further south compared to marine-terminating glaciers due to colder water temperatures and the lack of salinity-driven circulation, which strongly limit subaqueous melt as well as calving as a result of undercutting of the glacier front.

### Reviewer Comment:

The calving style post 2012 retreat also reminds me of Helheim Glacier’s terminus position and calving style (Bézu and Bartholomäus 2024). Although Helheim Glacier is a marine-terminating glacier, it has recently formed a long floating tongue and has calving events that do not affect velocity, similar to LT calving events (Shahin et al., 2025). That said, similar calving styles and terminus advance/retreat cycles can occur in environments with presumably higher subaqueous melt rates, or at least in environments with warmer water (e.g., Helheim; Straneo et al., 2010).

### Author Response:

The referee compares the calving style of LT with that of other marine-terminating glaciers like Helheim, Kangerdlussuaq and Rink Glacier. However, we believe that the calving style is distinctively different compared to those glaciers. The difference between the two calving styles is nicely summarised in Bézu and Bartholomäus (2024), differentiating the categories of "slab capsized" and "tabular rift" calving.

The former describes glaciers that are "nearly grounded" and experience somewhat frequent calving of icebergs that capsize and are usually < 200 m. Here calving occurs dominantly due to buoyant forces pushing the terminus upward leading to the formation of basal crevasses and icebergs rotating bottom out away from the glacier front. For the second category, however, calving occurs due to rifts forming horizontally across the glacier, discharging large tabular icebergs, usually > 200 m and without capsizing. Although rifting is not always visible from satellite images at LT, the immense size, the fact that icebergs don't capsize and the low frequency of calving indicate that LT falls into this category and is comparable with large fully floating ice tongues such as Petermann (e.g. Johannessen et al., 2013) and Ryder Glacier (e.g. Holmes et al., 2021) which are only found in North Greenland. We have added to the section "Dynamics of the lake terminus" to more clearly explain the type of calving that we see.

### **Manuscript Changes:**

We observe a distinct calving pattern at the lake terminus that can be described as follows: The glacier experiences long advance phases that can persist throughout the melt seasons and can last longer than a full year. These advance phases are interrupted by the calving of large tabular icebergs (most larger than 200 m). Some calving events follow the formation of clearly visible rifts, while others don't show clear rift formation. Almost all icebergs detach from the glacier front and drift away without capsizing. This calving style is typical for fully floating ice tongues in Greenland (Bézu and Bartholomäus, 2024) and resembles that of large fully floating ice tongues in North Greenland, like Peterman (e.g. Johannessen et al., 2013) and Ryder Glacier (e.g. Holmes et al., 2021).

### **Reviewer Comment:**

Also, do the authors observe any changes in the LT glacier's grounding line? Could this also have a significant impact on the LT dynamics?

### **Author Response:**

Unfortunately, we don't have a record of grounding line position.

## Comment 3: Lake ice analogy to an ice mélange

### Reviewer Comment:

This is more of a minor point, but I am confused as to why the authors claim that lake ice is the reason for the absence of calving activity outside the runoff season, rather than simply that runoff is the reason. Or at least a combination of lake ice and runoff. Since this is stated in the abstract, it requires clarification. I am also not sure how much buttressing force lake ice can provide when considering mélange thickness, as mélange can be an order of magnitude(s?) thicker than lake ice (Meng et al., 2025).

### Author Response:

We agree with reviewer and are grateful for the provided literature. We have removed our interpretation that lake ice acts in a similar way as an ice mélange, as evidence for that is lacking. In the revised manuscript we mention that lake ice possibly prevents icebergs from drifting away and helps to keep the glacier front together in winter, but not that it provides a buttressing effect similar to an ice mélange.

### Manuscript Changes:

Furthermore, we observe that all calving events occur outside of the lake ice covered period. Although lake ice could provide some backstress to the glacier, it is unclear as to what magnitude and what effect it would have on calving. However, we believe that lake ice possibly functions as a binder, preventing icebergs from drifting away, helping to keep the glacier front together during winter.

## Comment 4: on Section 5.5

### Reviewer Comment:

Both of the bullets in this section describe a “general” lake and fjord system in Greenland, but since the Qooqqup Sermia system is so unique, I don’t believe these general statements apply here. Below are my confusions with this section.

1. The authors state that warm Atlantic Water likely doesn’t reach the MT glacier because of the moraine, but in point 1 they describe a general tidewater glacier system in Greenland that does? This does not appear relevant for its own list element for this manuscript
2. Since the MT glacier calves quite often outside of the runoff season, I’m not sure how much this point applies here, other than possible but speculative winter-time discharge (Hansen et al., 2025).

The authors also indicate that direct observations are missing in lines 385-386, so I am confused as to why inferring melt rates for the MT glacier is necessary. I would consider removing this section, or perhaps making it about how the Qooqqup Sermia system is unique and not like a “traditional” tidewater glacier system in Greenland.

### Author Response:

We have revised the section 5.5 in order to elaborate in more detail as to why subaqueous melt rates are lower at LT compared to MT. The arguments we provide hold true for our case but also for a comparison of lakes and fjords in general. We think that it is a very valuable comparison for readers working with these environments as it also applies to other regions.

### Manuscript Changes:

#### 5.5 Key differences between the lake and marine terminus and potential causes

In previous sections, we illustrated that the lake- and marine-terminating glacier exhibit contrasting dynamics, despite being subject to the same climatic conditions. The key differences can be summarised as the following: We observe the marine terminus to be a fast flowing, grounded glacier with frequent small-size calving events, mainly in the form of serac failure type. The lake terminating glacier, on the other hand, has a floating extension and experiences rare, but very large calving events, producing large tabular icebergs. Furthermore, MT shows a clear seasonality with glacier front retreat in summer and advance in winter as well as a coupling of ice flow velocities to the glacier front position. In contrast, LT does not have seasonal ice front fluctuations, and ice flow velocities do not seem to be coupled to the front position.

Differences in bedrock geometry and ice thickness certainly partly determine the dynamics at the two termini. However, in addition, we identified the following physical differences between the two environments, which potentially influence the morphology and dynamics at the glacier termini. The following considerations apply to this study and, in general, to the comparison of marine- and lake-terminating glaciers.

1. Freezing point depression: In the marine environment, the freezing point of ocean water is lowered due to the salt content. With a salinity of 32 PSU the freezing point drops to about -1.8 °C. A lower freezing point increases the thermal driving (or thermal excess), consequently increasing

submarine melt rates. Even in a cold ocean environment this freezing point depression leads to higher melt rates compared to a freshwater environment. For example, assuming an ocean temperature of 0.6 °C (average temperature of the top 100 m measured by Hansen et al. (2025) in Tunulliarfik Fjord, close to Qooroq Fjord ) and a lake temperature of 0.7 °C (measured in lake Motzfeldt) results in a thermal driving that is 3 to 4 times higher in the ocean compared to the lake (2.4 °C vs 0.7 °C above the freezing point).

2. No subglacial plume formation: The formation of subglacial plumes can significantly enhance submarine melt rates (Jenkins, 2011), promote undercutting, and consequently calving (Slater et al., 2017). However, lakes generally consist of freshwater and therefore lack circulation, driven by the density differences of fresh and salt water (Truffer and Motyka, 2016). Consequently, we observe the formation of subglacial plumes at MT but not at LT, arguably leading to even higher melt rates at MT compared to LT. Furthermore, this implies that additional runoff at MT would enhance melt rates by generating stronger plumes, whereas in the lake, additional runoff would not affect melt rates and could even cause the lake to cool. This could possibly explain why seasonality in front positions is observed at MT but not at LT.
3. Heat transport: A lake is a semi-closed system where no transport of large quantities of warm water masses toward the glacier front from distant sources takes place. The energy input to the lake is limited to long and short wave radiation, heat exchange with the atmosphere, and advected heat (e.g., rainwater, streams, and groundwater) (Wetzel and Likens, 2000). In the fjord, on the other hand, water masses can be transported to and from the glacier front through ocean circulation and exchange with more distant water masses. Even in fjords with a prominent sill, exchange with shelf water is not completely blocked, and cold water can be transported away and exchanged with warmer waters (e.g. Mortensen et al., 2018).

The differences outlined above clearly demonstrate that subaqueous melt rates must be higher at MT than at LT, even with cold ocean conditions. The presence of a meltwater plume, the undercutting of the ice front, and the correlation between surface runoff and glacier front position all suggest that submarine melting affects the dynamics of the marine-terminating glacier. At LT on the other hand, low melt rates create favourable conditions for a floating extension of the glacier through limited thinning and calving rates. This comparison indicates that the difference in subaqueous melt rate contributes to the contrasting dynamics that we observe.

## Comment 5: on the conclusion

### Reviewer Comment:

On line 401, what parameterizations are you referring to? Calving, sliding, melt rates? When making a general call for modelers, consider what specifics a modeler might need to take your advice.

### Author Response:

Because this sentence was too unspecific we have removed it.

### Reviewer Comment:

For the third bullet (lines 402 - 405). The pinning points and water depth appear to have a much more considerable effect than the melt rates. Would this statement imply that the lake melt rates changed, and hence why the LT glacier responded to a potential change in melt rates? I think the bed geometry and pinning points should be emphasized more in the conclusions.

### Author Response:

We have emphasized the role of the pinning point for the disintegration of the ice tongue.

### Manuscript Changes:

- The massive retreat of more than 3 km of the lake terminus in one year highlights the possibility of rapid mass loss at lake-terminating glaciers in Greenland, stressing their importance for the future evolution of the Greenland ice sheet. The retreat was likely connected to the separation from a pinning point.

### Reviewer Comment:

4th bullet (lines 406-407). Is it lake ice, or runoff, or both?

### Author Response:

We have removed this bullet point, as we have also revised our interpretation of the effect of lake ice.

## Technical corrections:

### Reviewer Comment:

L13: The authors mention “require different parameterisations” several times, but it is unclear what parameterisations they are referring to. Consider being more specific here. Calving parameterisations? Sliding?

### Author Response:

Changed to "Our results stress that lake- and marine-terminating glaciers require separate estimates of frontal ablation through subaqueous melt when included in model simulations of the Greenland Ice Sheet."

### Reviewer Comment:

L31: What regions are you referring to?

### Author Response:

North East. (Carrivick et al., 2022)

### Reviewer Comment:

L53: Similar to the L13 comment. How would the authors suggest handling this unique situation at their study site? Consider removing or rephrasing this.

### Author Response:

Changed to "Our results stress that lake- and marine-terminating glaciers require separate estimates of frontal ablation through subaqueous melt when included in model simulations of the Greenland Ice Sheet."

### Reviewer Comment:

L54: Consider changing the section title to “Qooqqup Sermia system: A unique study site in South Greenland”. This provides the reader with easier access to the name of the study site and does not have to go searching through the text as much.

### Author Response:

Changed as suggested.

### Reviewer Comment:

L94-96: Where the calving events not cataloged for the MT glacier, too?

### Author Response:

No. We want to clarify that the recorded ice front positions at MT represent the cumulative front change between two satellite images as the result of many small calving events and ice flow, therefore not representing single calving events.

**Reviewer Comment:**

L146: I would reorder to conductivity, temperature, and depth.

**Author Response:**

Changed as suggested

**Reviewer Comment:**

L148: What is a RBR Duet3?

**Author Response:**

It is the name of the temperature and depth sensor. We added "temperature and depth sensor" to clarify.

**Reviewer Comment:**

L348: No need for parentheses around the citation.

**Author Response:**

The citation was removed, while the section was revised to reply to other comments.

**Reviewer Comment:**

L367: Very minor, but I'd consider these "sections" and not chapters.

**Author Response:**

Changed to "sections".

## Figures:

### Reviewer Comment:

Figure 1: Adding both the OMG bathymetry and the lake bathymetry to the map would greatly improve the interpretation of this environment. Please consider adding this, especially since the moraine is quite important for the ocean dynamics.

### Author Response:

Here we would like to refer the reader to our descriptions of the study site as well as of the bathymetry measurements. The essential locations are indicated in Figure 1 and the lake bathymetry is shown in Figure 4. We believe adding the two bathymetry datasets, would decrease the overall readability of the map.

### Reviewer Comment:

Figures 2-3: These are beautiful figures.

### Author Response:

Many thanks!

### Reviewer Comment:

Figure 4: What numeric values do the floatation index represent? Try expanding the color bar and add the numeric values.

### Author Response:

Numeric values added. A value of zero means that the ice thickness below water is exactly the same as the water depth. A value of negative 100 means that the ice thickness is 100 less than the water depth at that location. A value of positive 100 means that the theoretical ice thickness exceeds the water depth by 100 m. Hence, the glacier must be grounded at that location.

### Reviewer Comment:

Figure 5: The calving event label is missing in the legend.

### Author Response:

Label added.

## References

- Benn, D. I., Warren, C. R., and Mottram, R. H.: Calving processes and the dynamics of calving glaciers, *Earth-Science Reviews*, 82, 143–179, <https://doi.org/10.1016/j.earscirev.2007.02.002>, 2007.
- Bevan, S. L., Luckman, A. J., Benn, D. I., Cowton, T., and Todd, J.: Impact of warming shelf waters on ice mélange and terminus retreat at a large SE Greenland glacier, *The Cryosphere*, 13, 2303–2315, <https://doi.org/10.5194/tc-13-2303-2019>, 2019.
- Black, T. E. and Joughin, I.: Weekly to monthly terminus variability of Greenland’s marine-terminating outlet glaciers, *The Cryosphere*, 17, 1–13, <https://doi.org/10.5194/tc-17-1-2023>, 2023.
- Boyce, E. S., Motyka, R. J., and Truffer, M.: Flotation and retreat of a lake-calving terminus, Mendenhall Glacier, southeast Alaska, USA, *Journal of Glaciology*, 53, 211–224, <https://doi.org/10.3189/172756507782202928>, 2007.
- Bézu, C. and Bartholomäus, T. C.: Greenland Ice Sheet’s Distinct Calving Styles Are Identified in Terminus Change Timeseries, *Geophysical Research Letters*, 51, e2024GL110224, <https://doi.org/10.1029/2024GL110224>, 2024.
- Carrivick, J. L., How, P., Lea, J. M., Sutherland, J. L., Grimes, M., Tweed, F. S., Cornford, S., Quincey, D. J., and Mallalieu, J.: Ice-Marginal Proglacial Lakes Across Greenland: Present Status and a Possible Future, *Geophysical Research Letters*, 49, e2022GL099276, <https://doi.org/10.1029/2022GL099276>, 2022.
- Cassotto, R., Fahnestock, M., Amundson, J. M., Truffer, M., and Joughin, I.: Seasonal and interannual variations in ice mélange and its impact on terminus stability, Jakobshavn Isbræ, Greenland, *Journal of Glaciology*, 61, 76–88, <https://doi.org/10.3189/2015JoG13J235>, 2015.
- Fried, M. J., Catania, G. A., Bartholomäus, T. C., Duncan, D., Davis, M., Stearns, L. A., Nash, J., Shroyer, E., and Sutherland, D.: Distributed subglacial discharge drives significant submarine melt at a Greenland tidewater glacier, *Geophysical Research Letters*, 42, 9328–9336, <https://doi.org/10.1002/2015GL065806>, 2015.
- Fried, M. J., Catania, G. A., Stearns, L. A., Sutherland, D. A., Bartholomäus, T. C., Shroyer, E., and Nash, J.: Reconciling Drivers of Seasonal Terminus Advance and Retreat at 13 Central West Greenland Tidewater Glaciers, *Journal of Geophysical Research: Earth Surface*, 123, 1590–1607, <https://doi.org/10.1029/2018JF004628>, 2018.
- Greene, C. A., Gardner, A. S., Wood, M., and Cuzzone, J. K.: Ubiquitous acceleration in Greenland Ice Sheet calving from 1985 to 2022, *Nature*, 625, 523–528, <https://doi.org/10.1038/s41586-023-06863-2>, 2024.
- Hansen, K., Karlsson, N. B., How, P., Poulsen, E., Mortensen, J., and Rysgaard, S.: Winter subglacial meltwater detected in a Greenland fjord, *Nature Geoscience*, 18, 219–225, <https://doi.org/10.1038/s41561-025-01652-0>, 2025.
- Hewitt, I. J.: Subglacial Plumes, *Annual Review of Fluid Mechanics*, 52, 145–169, <https://doi.org/10.1146/annurev-fluid-010719-060252>, 2020.

- Hill, E. A., Carr, J. R., Stokes, C. R., and Gudmundsson, G. H.: Dynamic changes in outlet glaciers in northern Greenland from 1948 to 2015, *The Cryosphere*, 12, 3243–3263, <https://doi.org/10.5194/tc-12-3243-2018>, 2018.
- Holmes, F. A., Kirchner, N., Prakash, A., Stranne, C., Dijkstra, S., and Jakobsson, M.: Calving at Ryder Glacier, Northern Greenland, *Journal of Geophysical Research: Earth Surface*, 126, e2020JF005872, <https://doi.org/10.1029/2020JF005872>, 2021.
- Jenkins, A.: Convection-Driven Melting near the Grounding Lines of Ice Shelves and Tidewater Glaciers, *Journal of Physical Oceanography*, 41, 2279–2294, <https://doi.org/10.1175/JPO-D-11-03.1>, 2011.
- Johannessen, O. M., Babiker, M., and Miles, M. W.: Unprecedented Retreat in a 50-Year Observational Record for Petermann Glacier, North Greenland, *Atmospheric and Oceanic Science Letters*, 6, 259–265, <https://doi.org/10.3878/j.issn.1674-2834.13.0021>, 2013.
- Johnson, J. V., Prescott, P. R., and Hughes, T. J.: Ice dynamics preceding catastrophic disintegration of the floating part of Jakobshavn Isbræ, Greenland, *Journal of Glaciology*, 50, 492–504, <https://doi.org/10.3189/172756504781829729>, 2004.
- Joughin, I., Howat, I. M., Fahnestock, M., Smith, B., Krabill, W., Alley, R. B., Stern, H., and Truffer, M.: Continued evolution of Jakobshavn Isbrae following its rapid speedup, *Journal of Geophysical Research: Earth Surface*, 113, <https://doi.org/10.1029/2008JF001023>, 2008.
- Kajanto, K., Straneo, F., and Nisancioglu, K.: Impact of icebergs on the seasonal submarine melt of Sermeq Kujalleq, *The Cryosphere*, 17, 371–390, <https://doi.org/10.5194/tc-17-371-2023>, 2023.
- Kneib-Walter, A., Lüthi, M. P., Moreau, L., and Vieli, A.: Drivers of Recurring Seasonal Cycle of Glacier Calving Styles and Patterns, *Frontiers in Earth Science*, 9, <https://doi.org/10.3389/feart.2021.667717>, 2021.
- Millan, R., Jager, E., Mouginot, J., Wood, M. H., Larsen, S. H., Mathiot, P., Jourdain, N. C., and Bjørk, A.: Rapid disintegration and weakening of ice shelves in North Greenland, *Nature Communications*, 14, 6914, <https://doi.org/10.1038/s41467-023-42198-2>, 2023.
- Moon, T., Joughin, I., and Smith, B.: Seasonal to multiyear variability of glacier surface velocity, terminus position, and sea ice/ice mélange in northwest Greenland, *Journal of Geophysical Research: Earth Surface*, 120, 818–833, <https://doi.org/10.1002/2015JF003494>, 2015.
- Mortensen, J., Rysgaard, S., Arendt, K. E., Juul-Pedersen, T., Sjøgaard, D. H., Bendtsen, J., and Meire, L.: Local Coastal Water Masses Control Heat Levels in a West Greenland Tidewater Outlet Glacier Fjord, *Journal of Geophysical Research: Oceans*, 123, 8068–8083, <https://doi.org/10.1029/2018JC014549>, 2018.
- Mouginot, J., Rignot, E., Scheuchl, B., Fenty, I., Khazendar, A., Morlighem, M., Buzzi, A., and Paden, J.: Fast retreat of Zachariæ Isstrøm, northeast Greenland, *Science*, 350, 1357–1361, <https://doi.org/10.1126/science.aac7111>, 2015.
- Rignot, E., Fenty, I., Xu, Y., Cai, C., and Kemp, C.: Undercutting of marine-terminating glaciers in West Greenland, *Geophysical Research Letters*, 42, 5909–5917, <https://doi.org/10.1002/2015GL064236>, 2015.

- Schild, K. M. and Hamilton, G. S.: Seasonal variations of outlet glacier terminus position in Greenland, *Journal of Glaciology*, 59, 759–770, <https://doi.org/10.3189/2013JoG12J238>, 2013.
- Slater, D. A., Nienow, P. W., Goldberg, D. N., Cowton, T. R., and Sole, A. J.: A model for tide-water glacier undercutting by submarine melting, *Geophysical Research Letters*, 44, 2360–2368, <https://doi.org/10.1002/2016GL072374>, 2017.
- Todd, J. and Christoffersen, P.: Are seasonal calving dynamics forced by buttressing from ice mélange or undercutting by melting? Outcomes from full-Stokes simulations of Store Glacier, West Greenland, *The Cryosphere*, 8, 2353–2365, <https://doi.org/10.5194/tc-8-2353-2014>, 2014.
- Truffer, M. and Motyka, R. J.: Where glaciers meet water: Subaqueous melt and its relevance to glaciers in various settings, *Reviews of Geophysics*, 54, 220–239, <https://doi.org/10.1002/2015RG000494>, 2016.
- Trüssel, B. L., Motyka, R. J., Truffer, M., and Larsen, C. F.: Rapid thinning of lake-calving Yakutat Glacier and the collapse of the Yakutat Icefield, southeast Alaska, USA, *Journal of Glaciology*, 59, 149–161, <https://doi.org/10.3189/2013JOG12J081>, 2013.
- Warren, C., Benn, D., Winchester, V., and Harrison, S.: Buoyancy-driven lacustrine calving, Glaciar Nef, Chilean Patagonia, *Journal of Glaciology*, 47, 135–146, <https://doi.org/10.3189/172756501781832403>, 2001.
- Wehrlé, A., Lüthi, M. P., and Vieli, A.: The control of short-term ice mélange weakening episodes on calving activity at major Greenland outlet glaciers, *The Cryosphere*, 17, 309–326, <https://doi.org/10.5194/tc-17-309-2023>, 2023.
- Wekerle, C., McPherson, R., von Appen, W.-J., Wang, Q., Timmermann, R., Scholz, P., Danilov, S., Shu, Q., and Kanzow, T.: Atlantic Water warming increases melt below Northeast Greenland’s last floating ice tongue, *Nature Communications*, 15, 1336, <https://doi.org/10.1038/s41467-024-45650-z>, 2024.
- Wetzel, R. G. and Likens, G. E.: The Heat Budget of Lakes, in: *Limnological Analyses*, edited by Wetzel, R. G. and Likens, G. E., pp. 45–56, Springer New York, New York, NY, ISBN 978-1-4757-3250-4, [https://doi.org/10.1007/978-1-4757-3250-4\\_4](https://doi.org/10.1007/978-1-4757-3250-4_4), 2000.
- Wood, M., Rignot, E., Fenty, I., An, L., Bjørk, A., van den Broeke, M., Cai, C., Kane, E., Menemenlis, D., Millan, R., Morlighem, M., Mouginot, J., Noël, B., Scheuchl, B., Velicogna, I., Willis, J. K., and Zhang, H.: Ocean forcing drives glacier retreat in Greenland, *Science Advances*, 7, eaba7282, <https://doi.org/10.1126/sciadv.aba7282>, 2021.
